# Supplementary material
Source: ML conference proceedings conference paper supplement (https://openaccess.thecvf.com/content/CVPR2024/html/Ye_G-HOP_Generative_Hand-Object_CVPR_2024_paper.html)
Supplement: Supplementary file 1 [file Ye_G-HOP_Generative_Hand-Object_CVPR_2024_supplemental.pdf]

# G-HOP: Generative Hand-Object Prior for Interaction Reconstruction and Grasp Synthesis

## Supplementary Material

In the supplementary materials, we provide more implementation details and experimental results on the generative hand-object prior, prior-guided reconstruction, as well as prior-guided grasp synthesis. We discuss network architecture (Sec. A.1), effect of hand representation (Sec. A.2), how to extract hand pose from skeletal distance field (Sec. A.3), and the text prompt we used (Sec. A.4). Then, we show implementation details in reconstructing interaction clips and per-category results in Sec. B. Furthermore, we analyze the effect of mesh refinement in grasp synthesis and discuss comparison with prior work Grasping Field [5] in Sec. C.

### A. Hand-Object Prior

#### A.1. Network Architecture

We use the same network architecture of latent autoencoder and 3D UNet diffusion model backbone as in SDFusion [1]. The 3D UNet backbone consists of several residual blocks. Each block is a stack of GroupNorm layer [10], non-linear activation [2], and 3D convolutional layer, with optional cross attention layer to time embedding and text embedding. We provide an overview of network details and hyperparameters of our model in Tab. 4.

|                       | G-HOP           |
|-----------------------|-----------------|
| $z$ -shape            | $16^3 \times 3$ |
| $ \mathcal{Z} $       | 8196            |
| Input Channel         | 3 + 15          |
| Diffusion Steps       | 1000            |
| Noise Schedule        | linear          |
| Channels              | 64              |
| Number of Blocks      | 3               |
| Attention resolutions | 4,2             |
| Channel Multiplier    | 1,2,3           |
| Number of Heads       | 8               |
| Transformers Depth    | 1               |
| Batch Size            | 64              |
| Iterations            | 500k            |
| Learning Rate         | 1e-4            |

Table 4. Network architecture for G-HOP.

#### A.2. Ablating Skeletal Distance Field

Many previous work [6, 9] learn a diffusion model in the compact hand/human pose parameter space. We try to rep-

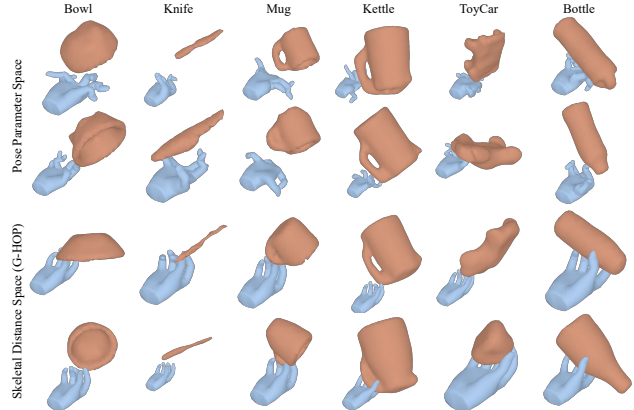

Figure 13. **Comparing Hand Representation in Generative Hand-Object Prior:** Top 2 rows show the diffusion model that represents hand shape as pose parameters; bottom 2 rows show the diffusion model (ours) that represents hand shape as skeletal distance field. The homogeneous grid space is easier for the network to reason about interaction.

resent hand shape by hand pose parameters but find that this pose space is not optimal for jointly diffusing hand pose and objects in interaction. More specifically, the ablated method (pose parameter space) uses the same architecture as the main model except for the (noisy) pose parameter is passed via cross-attention layer instead of concatenating skeletal distance field to the object latent grid. We also search hyperparameters such as weights in DDPM loss to balance diffusing hand pose and diffusing object latent. We visualize the best ablated model in Fig. 13 in comparison with our proposed model that represent hand shape by skeletal distance field. The diffusion model with pose parameter space struggles to generate plausible hand articulation together with objects. This is probably because the diffusion model is hard to reason about interaction in the heterogeneous space (1D hand pose and 3D object grids).

#### A.3. Hand Pose from Skeletal Distance Field

Our proposed diffusion model generates skeletal distance field, from which hand pose parameters can be extracted. Given a target skeletal distance field  $\hat{H}$ , we optimize hand pose  $\theta$  such that its induced field is closer to the target, *i.e.*  $\theta^* = \arg \min_{\theta} (H(\theta) - \hat{H})^2 + w \|\theta\|_2^2$ . We set  $w$  to 1e-5 and optimizes for 1000 steps with Adam optimizer [7] with learning rate 1e-2.

### A.4. Text Prompt Template

We use the template “a hand holding a  $\{category\}$ ” to convert category into a text prompt. In addition, we find that appending additional category attribute like size and shape beneficial when we scale up the number of category (see results in Sec. B). It may be because attributes help to transfer information between categories with similar shapes but distinct semantics, *e.g.* pens and spoons are all thin sticks. We use LLM [8] to generate attribute automatically. We list text prompt we used in Tab. 11.

## B. Reconstructing Interaction Clips

Following prior work [12], we evaluate reconstruction on two sequences per category on HOI4D. We report mean performance per category in terms of object error (Tab. 5), hand error (Tab. 6), and their alignment (Tab. 7). In addition to baselines and ablations reported in main paper, we also analyze the effect of other implementation details as follows:

**Dynamic Noise Threshold.** The amount of injected noise in SDS has large impact on the guidance effect. We find that thin structures are better captured when adding a smaller noise while thick structure are better captured when adding larger noise. We use an adaptive noise scheduler that dynamically adjusts the maximum amount of noise  $U_b, i \sim \mathcal{U}[U_a, U_b]$  based on the current object shape. More specifically, it is a linear interpolation based on minimal object SDF value in the current representation, *i.e.*

$$U_b = \frac{s - s_{\min}}{s_{\max} - s_{\min}} U_{b_{\max}} + \left(1 - \frac{s - s_{\min}}{s_{\max} - s_{\min}}\right) U_{b_{\min}}$$

$$s = \text{clamp}(\min O[X_{grid}], s_{\min}, s_{\max})$$

In our experiment, we set  $U_{b_{\max}} = 0.75, U_{b_{\min}} = 0.25, s_{\min} = -0.2, s_{\max} = -0.01$ . As reported in Tab. 8, our dynamic noise threshold leads to better performance than constant noise threshold.

**Scaling Up Number of Categories.** For fair comparison, we use the diffusion model that only trains on HOI4D dataset to reconstruct interaction clips. In Tab. 8,, we also compare with the generalist model (G-HOP (G)) that trains on all seven datasets. Note that we use G-HOP (G) in all other experiments. We find that adding attribute to text prompt helps when scaling up to more categories. While G-HOP (G) leads to a bit worse reconstruction performance on the HOI4D dataset than the specialist which is trained only on HOI4D, it still outperforms other baselines.

**2D Joint Prior.** We trained a joint prior version of DiffHOI, or a 2D version of G-HOP  $p(\pi(O), \pi(H)|C)$ . Interestingly, we find that this cannot effectively guide grasp

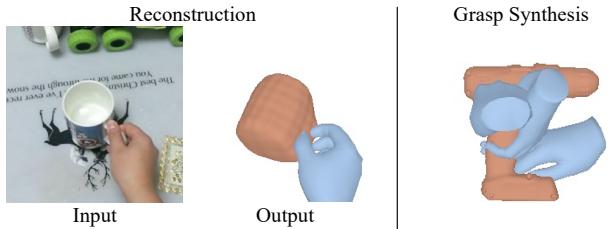

Figure 14. **2D Joint Prior (DiffHOI-J)**: reconstruction and grasp synthesis results guided by 2D joint prior.

synthesis or reconstruction (Fig. 14, Tab. 5-7). It performs even worse than DiffHOI [12], perhaps because it is harder to learn the distribution over object, hand, and rendering viewpoints (unlike DiffHOI where the ‘conditioning’ informs about the hand and viewpoint).

## C. Grasp Synthesis

**Comparison with Grasping Field.** Grasping Field [5] is a representative method that uses a conditional VAE to generate hand surface distance field given an object point cloud. Their evaluation setup generates grasps for known object pose with respect to hand. We evaluate G-HOP under their setup by only optimizing hand articulation while keeping the relative pose as the given ground truth. We denote this setting with known object pose as \*. G-HOP also benefits from well initialized object poses as contact ratio increases to 100%. Our contact area reduces probably because the given object pose are obtained from GT grasps that uses more finger tips and this makes the human hand palm harder to make contact. We also show that randomizing the relative pose (our evaluation setup) significant affects their performance, as visualized in Fig. 15. Note that GF gets large intersection volume but less intersection depth. This is because the latter is only calculated on each hand vertices inside of the object. For example, in the second row of Fig. 15, the knife penetrates hand, leading to high volume. But the maximum intersection depth for each hand vertices is less than the thickness of the knife.

**Effect of Refinement** After optimizing human grasps with respect to SDS loss using object SDF grid, we also do a light-weight mesh refinement by replacing the object SDF grid with the original mesh. It is to account for loss of accuracy during mesh conversion. We use the same objectives in previous work [3, 11] that encourage contact and discourage penetration. We denote the generated grasps before mesh refinement as † and report its performance on two datasets in Tab. 10. Even without mesh refinement, the generated grasps also have large contact area and less displacement in simulation. The refinement process can adjust hand

Table 5. Comparing Object Error of HOI Reconstruction on HOI4D.

|              | Mug  |      |     | Bottle |      |     | Kettle |      |      | Bowl |      |     | Knife |      |     | ToyCar |      |     | mean |      |     |
|--------------|------|------|-----|--------|------|-----|--------|------|------|------|------|-----|-------|------|-----|--------|------|-----|------|------|-----|
|              | F5↑  | F10↑ | CD↓ | F5↑    | F10↑ | CD↓ | F5↑    | F10↑ | CD↓  | F5↑  | F10↑ | CD↓ | F5↑   | F10↑ | CD↓ | F5↑    | F10↑ | CD↓ | F5↑  | F10↑ | CD↓ |
| iHOI [11]    | 0.44 | 0.71 | 2.1 | 0.47   | 0.77 | 1.5 | 0.21   | 0.45 | 6.3  | 0.38 | 0.64 | 3.1 | 0.33  | 0.68 | 2.8 | 0.66   | 0.95 | 0.5 | 0.42 | 0.70 | 2.7 |
| HHOR [4]     | 0.18 | 0.37 | 6.9 | 0.26   | 0.56 | 3.1 | 0.12   | 0.30 | 11.3 | 0.31 | 0.54 | 4.2 | 0.71  | 0.93 | 0.6 | 0.26   | 0.59 | 1.9 | 0.31 | 0.55 | 4.7 |
| DiffHOI [12] | 0.64 | 0.86 | 1.0 | 0.54   | 0.92 | 0.7 | 0.43   | 0.77 | 1.5  | 0.79 | 0.98 | 0.4 | 0.50  | 0.95 | 0.8 | 0.83   | 0.99 | 0.3 | 0.62 | 0.91 | 0.8 |
| G-HOP        | 0.62 | 0.93 | 0.7 | 0.93   | 1.00 | 0.2 | 0.64   | 0.96 | 0.6  | 0.66 | 0.96 | 0.5 | 0.91  | 0.99 | 0.2 | 0.78   | 0.98 | 0.3 | 0.76 | 0.97 | 0.4 |
| G-HOP(Cond)  | 0.57 | 0.87 | 1.0 | 0.74   | 0.98 | 0.4 | 0.46   | 0.83 | 1.3  | 0.47 | 0.84 | 1.1 | 0.95  | 1.00 | 0.1 | 0.74   | 0.98 | 0.4 | 0.66 | 0.92 | 0.7 |
| G-HOP(2D)    | 0.54 | 0.80 | 1.3 | 0.26   | 0.58 | 2.5 | 0.46   | 0.85 | 1.1  | 0.35 | 0.57 | 6.4 | 0.21  | 0.68 | 1.9 | 0.79   | 0.97 | 0.3 | 0.43 | 0.74 | 2.3 |

Table 6. Comparing Hand Error of HOI Reconstruction on HOI4D.

|              | Mug    |      | Bottle |      | Kettle |      | Bowl   |      | Knife  |      | ToyCar |      | mean   |      |
|--------------|--------|------|--------|------|--------|------|--------|------|--------|------|--------|------|--------|------|
|              | MPJPE↓ | AUC↑ |
| iHOI [11]    | 1.10   | 0.78 | 1.09   | 0.78 | 1.11   | 0.78 | 1.23   | 0.76 | 1.39   | 0.72 | 1.20   | 0.76 | 1.19   | 0.76 |
| DiffHOI [12] | 1.06   | 0.79 | 1.01   | 0.80 | 1.07   | 0.79 | 1.21   | 0.76 | 1.33   | 0.73 | 1.04   | 0.79 | 1.12   | 0.78 |
| G-HOP        | 1.02   | 0.80 | 0.97   | 0.81 | 0.98   | 0.81 | 1.09   | 0.78 | 1.20   | 0.76 | 1.02   | 0.80 | 1.05   | 0.79 |
| G-HOP(Cond)  | 1.08   | 0.78 | 1.06   | 0.79 | 1.09   | 0.79 | 1.18   | 0.76 | 1.34   | 0.73 | 1.11   | 0.78 | 1.14   | 0.77 |
| G-HOP(2D)    | 1.10   | 0.78 | 0.97   | 0.81 | 1.06   | 0.79 | 1.24   | 0.75 | 1.24   | 0.75 | 1.07   | 0.79 | 1.11   | 0.78 |

Table 7. Comparing Hand-Object Alignment ( $CD_h \downarrow$ ) of HOI Reconstruction on HOI4D.

|              | Mug   | Bottle | Kettle | Bowl  | Knife | ToyCar | mean  |
|--------------|-------|--------|--------|-------|-------|--------|-------|
| iHOI [11]    | 19.7  | 13.9   | 35.9   | 49.3  | 21.9  | 21.6   | 27.1  |
| HHOR [4]     | 229.1 | 172.0  | 100.4  | 50.1  | 185.1 | 255.8  | 165.4 |
| DiffHOI [12] | 18.1  | 15.3   | 42.2   | 101.8 | 91.6  | 23.3   | 48.7  |
| G-HOP        | 12.4  | 9.7    | 41.8   | 26.2  | 13.2  | 7.5    | 18.4  |
| G-HOP(Cond)  | 10.2  | 6.9    | 40.7   | 10.4  | 39.1  | 8.5    | 19.3  |
| G-HOP(2D)    | 14.5  | 33.6   | 61.6   | 71.0  | 141.7 | 38.8   | 60.2  |

Table 8. Additional Ablation Studies of HOI reconstruction: We report object error (F@5mm, F@10mm, CD), hand-object alignment  $CD_h$ , and hand error (MPJPE, AUC) on HOI4D. We analyze the effect of other implementation details, including dynamic noise thresholding and choice of text prompt templates.

|                    | Object Error |      |     | Align             | Hand Error |      |
|--------------------|--------------|------|-----|-------------------|------------|------|
|                    | F5↑          | F10↑ | CD↓ | $CD_h \downarrow$ | MPJPE↓     | AUC↑ |
| G-HOP              | 0.76         | 0.97 | 0.4 | 18.4              | 1.05       | 0.79 |
| $U_b = 0.25$       | 0.69         | 0.95 | 0.5 | 50.0              | 1.01       | 0.80 |
| $U_b = 0.75$       | 0.49         | 0.76 | 4.0 | 48.1              | 1.06       | 0.79 |
| G-HOP (G) w/ attr  | 0.65         | 0.92 | 0.7 | 17.8              | 1.06       | 0.79 |
| G-HOP (G) wo/ attr | 0.61         | 0.89 | 0.8 | 24.6              | 1.04       | 0.79 |

pose to further improves the contact and grasp stability.

### C.1. User Study Interface

Fig. 17 shows the user interface for evaluating the generated grasps. Users are presented two grasps visualized from dif-

Table 9. Comparison with Baselines: We compare human grasp synthesis along with prior work GF [5]. \* denotes GF’s evaluation setting with known object pose.

|       |         | Intersection |         | Disp. | Contact |         |        |
|-------|---------|--------------|---------|-------|---------|---------|--------|
|       |         | max D ↓      | avg D ↓ | vol ↓ | avg ↓   | ratio ↑ | area ↑ |
| ObMan | GF [5]* | 0.56         | 0.44    | 6.05  | 2.07    | 0.89    | 0.06   |
|       | G-HOP*  | 0.97         | 0.70    | 6.39  | 2.03    | 1.00    | 0.13   |
|       | GF [5]  | 0.79         | 0.64    | 43.35 | 1.82    | 1.00    | 0.09   |
|       | G-HOP   | 0.74         | 0.51    | 17.40 | 1.85    | 0.93    | 0.25   |

Table 10. Effect of Refinement: We report human grasp synthesis before and after mesh refinement. G-HOP† denotes generated grasps before mesh refinement.

|       |        | Intersection |         | Disp. | Contact |         |        |
|-------|--------|--------------|---------|-------|---------|---------|--------|
|       |        | max D ↓      | avg D ↓ | vol ↓ | avg ↓   | ratio ↑ | area ↑ |
| ObMan | G-HOP† | 0.74         | 0.57    | 8.25  | 3.87    | 0.82    | 0.12   |
|       | G-HOP  | 0.74         | 0.51    | 17.40 | 1.85    | 0.93    | 0.25   |
| HO3D  | G-HOP† | 1.84         | 0.31    | 11.46 | 0.95    | 1.00    | 0.23   |
|       | G-HOP  | 2.42         | 0.68    | 7.55  | 2.48    | 0.99    | 0.20   |

ferent view angles as gif and are asked to choose the more plausible grasps.

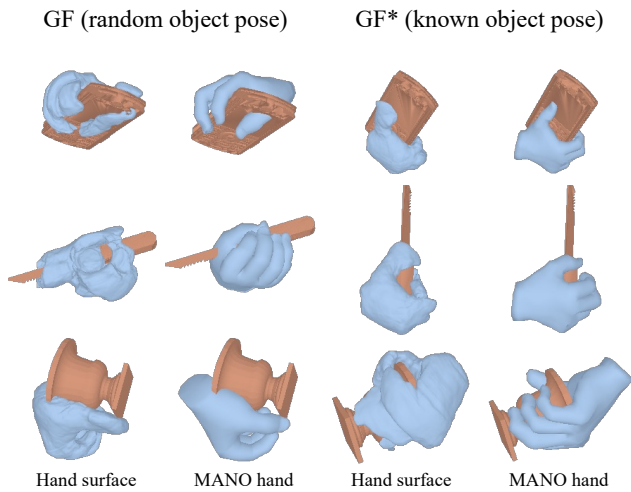

Figure 15. GF assumes known object pose when evaluating. Randomizing object pose affects their performance.

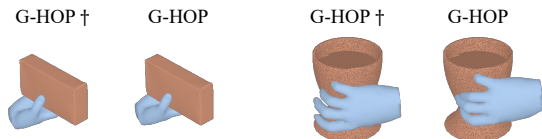

Figure 16. **Effect of Mesh Refinement:** We visualize synthesized grasps before (G-HOP†) and after (G-HOP) refinement.

## Introduction

Given an object (yellow mesh), we aim to predict a valid 3D hand pose to hold that objects, either to use it on our own or hand it over to others. In this survey, we would like to evaluate different methods and estimate whether their predicted hand poses (blue mesh) are compatible for this object. Note that the given mesh is not necessarily upright. So the interaction is reasonable as long as the interaction looks reasonable with one gravity direction.

## Examples

We provide typical samples that we define as **bad** as follows:

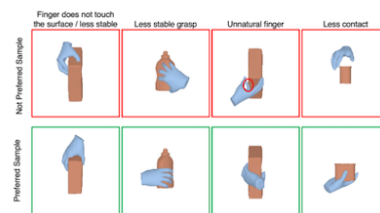

## What to do?

We will show you 2 hand-object interactions generated by different method. You are asked to choose the **ONE** that you think most reasonable from the 2 results. You will do 20 rounds of selection and it takes about 4 minutes. Many thanks for your help!

For any comments or questions, please email to yufeiy2@andrew.cmu.edu.com

Start Survey

Please click on the hand-object-interaction that you think is more plausible.

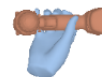

Method 1

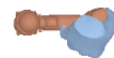

Method 2

Next

0% (0 / 20)

Figure 17. **User Study Interface:** We visualize user study interface including the user instruction page and the survey page.

Table 11. We provide list of class names and their attributes used in the text prompt. The class names are manually merged across different datasets while the attributes are automatically generated by large language model [8].

| Class        | Attribute                                      |
|--------------|------------------------------------------------|
| plate        | medium, flat, circular                         |
| baseboard    | big, long, rectangular                         |
| stamp        | small, flat, square                            |
| laptop       | big, flat, rectangular                         |
| funnel       | medium, conical                                |
| spatula      | medium, flat, elongated                        |
| pear         | small, pear shaped                             |
| lemon        | small, oval                                    |
| stick        | varies, cylindrical, long                      |
| cylinder     | varies, cylindrical                            |
| mug          | medium, cylindrical, handle attached           |
| flute        | medium, cylindrical, long                      |
| shield       | big, curved, oval or round                     |
| floor        | big, flat, rectangular or irregular            |
| mouse        | medium, oval, handheld                         |
| fish         | varies, animal shaped                          |
| screw driver | medium, cylindrical, elongated                 |
| pen          | small, cylindrical, elongated                  |
| hair dryer   | medium, elongated, handheld                    |
| burger       | medium, cylindrical, stacked layers            |
| paint roller | medium, cylindrical, handheld                  |
| power saw    | big, elongated, handheld or standalone         |
| bottle       | medium, cylindrical, narrow neck               |
| pump         | varies, mechanical, various shapes             |
| flask        | medium, cylindrical or conical, narrow neck    |
| sheet        | big, flat, rectangular                         |
| hand bag     | medium, varies, handle attached                |
| stapler      | medium, rectangular, handheld                  |
| gummy        | small, animal or object shaped                 |
| fork         | small, elongated, tines at one end             |
| wood         | varies, solid, various shapes                  |
| chopsticks   | small, cylindrical, elongated                  |
| strawberry   | small, heart-shaped                            |
| cupmod       | medium, cylindrical, handle attached           |
| spray        | medium, cylindrical, nozzle at top             |
| crate        | big, cuboid, open structure                    |
| microwave    | big, rectangular, box-like                     |
| headphone    | medium, round or oval, worn over ears          |
| apple        | small, round, stem at top                      |
| backpack     | big, varies, straps attached                   |
| brick        | medium, rectangular, solid                     |
| wood plank   | big, flat, rectangular                         |
| tv           | big, flat, rectangular                         |
| rubiks       | small, cubical, multicolored faces             |
| carpet       | big, flat, rectangular or oval                 |
| container    | varies, solid, various shapes                  |
| lego         | small, rectangular or square, connecting knobs |
| jar          | medium, cylindrical or oval, lid on top        |
| oven         | big, box-like, door at front                   |
| mixer        | big, varies, mechanical                        |
| train        | big, cylindrical, long                         |
| teddy bear   | medium, animal shaped, soft                    |
| chess rook   | small, cylindrical, castle-shaped top          |
| binoculars   | medium, cylindrical, two lenses                |
| pencil mod   | small, cylindrical, elongated                  |
| knife        | medium, flat, sharp edge                       |

Continued on next column

Continued from previous column

| Class        | Attribute                                      |
|--------------|------------------------------------------------|
| tin          | medium, cylindrical or rectangular, lid on top |
| light tube   | medium, cylindrical, elongated                 |
| ball         | small, spherical                               |
| cupcake      | small, cylindrical, rounded top                |
| spoon        | small, oval or round, handle attached          |
| chalk        | small, cylindrical, elongated                  |
| light bulb   | small, round, screw base                       |
| case         | varies, box-like, lid or zipper                |
| peg test     | varies, varies, testing equipment              |
| piggy bank   | medium, animal shaped, slot on top             |
| kettle       | medium, rounded, spout and handle              |
| wrench       | medium, elongated, adjustable jaw              |
| bacon        | small, flat, elongated                         |
| purse        | medium, varies, handle or strap                |
| boat         | big, elongated, hollow                         |
| disk         | small, flat, circular                          |
| game console | medium, ergonomic, buttons and joysticks       |
| troller      |                                                |
| keyboard     | medium, flat, rectangular                      |
| trowels      | medium, flat, handle attached                  |
| shovel       | big, flat, long handle                         |
| eye glasses  | small, oval or round, frame with lenses        |
| stanford     | small, animal shaped, 3D model                 |
| bunny        |                                                |
| camera       | medium, box-like, lens at front                |
| rifle        | big, elongated, barrel and stock               |
| can          | small, cylindrical, lid on top                 |
| range        | big, flat or box-like, knobs and burners       |
| toy airplane | small, aerodynamic, wings attached             |
| cube         | varies, cubical                                |
| tablet       | medium, flat, rectangular                      |
| teapot       | medium, rounded, spout and handle              |
| chair        | big, varies, seat and backrest                 |
| beaker       | small, cylindrical, pouring lip                |
| plum         | small, round, pit inside                       |
| triangle     | varies, triangular                             |
| barrel       | big, cylindrical, hollow                       |
| cup          | small, cylindrical, handle attached            |
| toothpaste   | small, cylindrical, tube-shaped                |
| bag          | varies, varies, handle or strap                |
| pyramid      | varies, pyramidal                              |
| dice         | small, cubical, numbered faces                 |
| ruler        | small, flat, rectangular                       |
| scissors     | small, paired blades, handles                  |
| clamp        | small, C or G shaped, screw mechanism          |
| phone        | medium, flat, rectangular                      |
| marbles      | small, spherical, glass or clay                |
| dart         | small, conical, pointed tip                    |
| calculator   | medium, flat, rectangular                      |
| duck         | varies, animal shaped                          |
| chain        | varies, interlinked, metal                     |
| bucket       | medium, cylindrical, handle attached           |
| peach        | small, round, pit inside                       |
| donut        | small, cylindrical, hole in center             |
| flashlight   | medium, cylindrical, light at one end          |
| sponge       | small, soft, varies                            |
| mat          | medium, flat, rectangular or oval              |
| cardboard    | varies, flat, rectangular                      |
| scoop        | small, semi-spherical, handle attached         |
| block        | varies, solid, cuboidal                        |
| pliers       | medium, paired jaws, handles                   |
| board        | big, flat, rectangular                         |

Continued on next column

Continued from previous column

| Class       | Attribute                                |
|-------------|------------------------------------------|
| shoe        | medium, foot-shaped, footwear            |
| floor mate  | varies, flat, used for cleaning          |
| brush       | varies, bristles attached, handle        |
| alarm clock | small, circular or square, time display  |
| hood        | big, curved, worn over head              |
| pot         | medium, cylindrical, handle attached     |
| chessboard  | medium, square, 8x8 squares              |
| pillow      | medium, soft, rectangular                |
| power drill | medium, cylindrical, elongated           |
| marshmallow | small, cylindrical or cubic, soft        |
| bowl        | medium, round, hollow                    |
| tube        | varies, cylindrical, hollow              |
| frisbee     | medium, flat, circular                   |
| hammer      | medium, heavy head, handle attached      |
| toothbrush  | small, bristles at end, handle           |
| toycar      | small, car shaped, wheels attached       |
| elephant    | big, animal shaped                       |
| tray        | medium, flat, raised edges               |
| box         | varies, cuboidal, lid or flaps           |
| book        | medium, flat, rectangular                |
| skillet lid | medium, flat or domed, handle on top     |
| table       | big, flat, supported by legs             |
| banana      | small, curved, elongated                 |
| padlock     | small, rounded or square, shackle on top |
| bin         | big, cylindrical or cuboidal, open top   |
| blender     | medium, cylindrical, mechanical          |
| pitcher     | medium, cylindrical, handle and spout    |
| toilet      | big, bowl-shaped, plumbing fixture       |
| wine glass  | small, stemmed, conical                  |
| towel       | big, flat, rectangular                   |
| vacuum      | big, cylindrical, mechanical             |
| chips       | small, flat, round or oval               |
| orange      | small, round, citrus fruit               |
| microphone  | small, cylindrical, handheld             |
| usb stick   | small, rectangular, electronic           |
| door knob   | small, round, mounted on door            |
| fryingpan   | medium, flat, round                      |
| watch       | small, round, straps attached            |
| eraser      | small, rectangular or cylindrical, soft  |

Concluded

## References

- [1] Yen-Chi Cheng, Hsin-Ying Lee, Sergey Tulyakov, Alexander G Schwing, and Liang-Yan Gui. Sdfusion: Multimodal 3d shape completion, reconstruction, and generation. In *CVPR*, 2023. 1
- [2] Stefan Elfving, Eiji Uchibe, and Kenji Doya. Sigmoid-weighted linear units for neural network function approximation in reinforcement learning. *Neural networks*, 2018. 1
- [3] Yana Hasson, Gül Varol, Dimitris Tzionas, Igor Kalevatykh, Michael J. Black, Ivan Laptev, and Cordelia Schmid. Learning joint reconstruction of hands and manipulated objects. In *CVPR*, 2019. 2
- [4] Di Huang, Xiaopeng Ji, Xingyi He, Jiaming Sun, Tong He, Qing Shuai, Wanli Ouyang, and Xiaowei Zhou. Reconstructing hand-held objects from monocular video. In *SIGGRAPH Asia*, 2022. 3
- [5] Korrawe Karunratanakul, Jinlong Yang, Yan Zhang, Michael J Black, Krikamol Muandet, and Siyu Tang. Grasping field: Learning implicit representations for human grasps. In *3DV*, 2020. 1, 2, 3
- [6] Korrawe Karunratanakul, Konpat Preechakul, Supasorn Suwajanakorn, and Siyu Tang. Guided motion diffusion for controllable human motion synthesis. In *ICCV*, 2023. 1
- [7] Diederik P Kingma, J Adam Ba, and J Adam. Adam: A method for stochastic optimization. *ICLR*, 2015. 1
- [8] OpenAI. Gpt-4 technical report, 2023. 2, 5
- [9] Guy Tevet, Sigal Raab, Brian Gordon, Yoni Shafir, Daniel Cohen-or, and Amit Haim Bermano. Human motion diffusion model. In *ICLR*, 2023. 1
- [10] Yuxin Wu and Kaiming He. Group normalization. In *ECCV*, 2018. 1
- [11] Yufei Ye, Abhinav Gupta, and Shubham Tulsiani. What’s in your hands? 3d reconstruction of generic objects in hands. In *CVPR*, 2022. 2, 3
- [12] Yufei Ye, Poorvi Hebbar, Abhinav Gupta, and Shubham Tulsiani. Diffusion-guided reconstruction of everyday hand-object interaction clips. In *ICCV*, 2023. 2, 3
